# Supplementary material for: Parents’ perceptions of their child’s weight among children in their first year of primary school: a mixed-methods analysis of an Australian cross-sectional (complete enumeration) study
Source: PubMed Central journal article supplement (PMC9050591; doi:10.1038/s41366-022-01068-5), 2022-01-24
Supplement: 41366_2022_1068_MOESM1_ESM.pdf [file 41366_2022_1068_MOESM1_ESM.pdf]

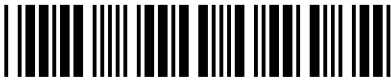

\* 3 7 6 2 5 \*

ACT Health

# Kindergarten Health Check Consent and Questionnaire 2017

URN :         Office use only

Please complete all details below in black pen  
**PERSONAL DETAILS OF YOUR CHILD**

Family name: \_\_\_\_\_

Given names: \_\_\_\_\_

DOB: \_\_\_\_/\_\_\_\_/\_\_\_\_ Gender: \_\_\_\_\_

School: \_\_\_\_\_ Roll group / Class: \_\_\_\_\_

Home Address: \_\_\_\_\_

Suburb / Town: \_\_\_\_\_ Postcode: \_\_\_\_\_

Postal Address (if different to home address): \_\_\_\_\_

Suburb / Town: \_\_\_\_\_ Postcode: \_\_\_\_\_

### Is your child of Aboriginal or Torres Strait Islander origin?

- No  Yes, Aboriginal  
 Yes, Torres Strait Islander  Yes, both Aboriginal and Torres Strait Islander

Does your child have a General Practitioner (GP) or Practice?  Yes  No

Name of Family Doctor: \_\_\_\_\_ Practice Name: \_\_\_\_\_

Address: \_\_\_\_\_

Suburb: \_\_\_\_\_ Postcode: \_\_\_\_\_ Phone: \_\_\_\_\_

### CONSENT FOR HEALTH CHECK

I/we have read and understood the Kindergarten Health Check information and I/we consent to the health check as described on the information sheet.  Yes  No

I/we consent to the School Health Nurse alerting my child's teacher to concerns relating to hearing and vision only.  Yes  No

Signature/s: \_\_\_\_\_  
Parent / Legal Guardian

Print name/s: \_\_\_\_\_ Date: \_\_\_\_/\_\_\_\_/2017  
(Please print clearly in BLOCK LETTERS)

### Parent / Guardian Contact Details

In listing your contact details you are giving the School Health Nurse permission to contact you regarding the Kindergarten Health Check, if required.

Home phone: \_\_\_\_\_

Best day time contact number: \_\_\_\_\_

Mobile/s: \_\_\_\_\_

\_\_\_\_\_

Kindergarten Health Check

**These questions ask you about your child's vision and hearing. Please tick ✓ the required boxes.**

## VISION

1. Do you have any concerns about your child's vision?  Yes  No

If yes, please describe: \_\_\_\_\_

2. Has your child been prescribed glasses?  Yes  No

If yes, when should they be worn? (e.g. when reading): \_\_\_\_\_

3. Has your child ever received, or are they receiving medical care for their eyes or vision?  Yes  No

If yes, please describe: \_\_\_\_\_

## HEARING

1. Do you have any concerns about your child's hearing or airways?  Yes  No

If yes, please describe: \_\_\_\_\_

2. Has your child had any of the following? Tick all that apply.

Repeated ear infections  Yes  No

Discharging ears  Yes  No

Hearing Loss  Yes  No

Grommets  Yes  No If yes, when were these inserted? \_\_\_\_\_

Snoring  Yes  No

3. Has your child ever received or are they receiving medical care for their ears, hearing or airways?  Yes  No

If yes, please describe: \_\_\_\_\_

Would you like information on any of the following? Tick all that apply.

Wetting pants  Yes  No

Wetting the bed  Yes  No

Soiling pants  Yes  No

This completes the questions relating to the health check conducted by the School Health Nurses.

The results will be posted to your nominated address.

Please continue answering the questions about your child's development on the following pages.

If you have any concerns about your child's health, please see your GP.



\* 3 7 6 2 5 \*

ACT Health  
**Kindergarten Health Questionnaire**

URN :         *Office use only*

Please complete all details below in black pen

**PERSONAL DETAILS OF YOUR CHILD**

**Family name:** \_\_\_\_\_

**Given names:** \_\_\_\_\_

**DOB:** \_\_\_\_\_ **Gender:** \_\_\_\_\_

**These questions ask you about your child's development.**

**PARENTS' EVALUATION OF DEVELOPMENTAL STATUS (PEDS)**

1. Please list any concerns about your child's learning, development and behaviour.

2. Do you have any concerns about how your child talks and makes speech sounds?

No  Yes  A little    Comments:

3. Do you have any concerns about how your child understands what you say?

No  Yes  A little    Comments:

4. Do you have any concerns about how your child uses his or her hands or fingers to do things?

No  Yes  A little    Comments:

5. Do you have any concerns about how your child uses his or her arms or legs?

No  Yes  A little    Comments:

6. Do you have any concerns about how your child behaves?

No  Yes  A little    Comments:

7. Do you have any concerns about how your child gets along with others?

No  Yes  A little    Comments:

8. Do you have any concerns about how your child is learning to do things for himself / herself?

No  Yes  A little    Comments:

9. Do you have any concerns about how your child is learning preschool or school skills?

No  Yes  A little    Comments:

10. Please list any other concerns..

**These questions ask you about asthma, eczema and hay fever.**

**RESPIRATORY SYMPTOMS**

1. Has your child ever had wheezing or whistling in the chest?  Yes  No
2. Has your child ever had asthma?  Yes  No
3. In the last 12 months has your child experienced any of the following respiratory symptoms?
- Wheezing or whistling in the chest  Yes  No
- A dry cough at night not associated with a cold or chest infection  Yes  No
- Wheezing with coughs or colds  Yes  No
- Shortness of breath when exercising or playing games or participating in sports  Yes  No
4. In the last 12 months how often, *on average*, have the following respiratory symptoms been present?  
Please tick one box on EACH line

|                                                     |                                |                                                 |                                            |                                                |
|-----------------------------------------------------|--------------------------------|-------------------------------------------------|--------------------------------------------|------------------------------------------------|
| Wheeze or whistle in the chest                      | <input type="checkbox"/> Never | <input type="checkbox"/> Less than 1 day / wk   | <input type="checkbox"/> 1 – 3 days / wk   | <input type="checkbox"/> 4 or more days / wk   |
| Night cough or night wheeze                         | <input type="checkbox"/> Never | <input type="checkbox"/> Less than 1 night / wk | <input type="checkbox"/> 1 – 3 nights / wk | <input type="checkbox"/> 4 or more nights / wk |
| Shortness of breath<br>(when exercising or playing) | <input type="checkbox"/> Never | <input type="checkbox"/> Less than 1 day / wk   | <input type="checkbox"/> 1 – 3 days / wk   | <input type="checkbox"/> 4 or more days / wk   |

**ECZEMA**

5. Has your child ever had an itchy rash that was coming and going for at least 6 months?  Yes  No
6. Has the itchy rash ever affected the following places?  Yes  No  
(the fold of the elbows, behind the knees, in front of the ankles, under the buttocks, or around the neck, ears or eyes)
7. Has your child ever had eczema?  Yes  No

**HAY FEVER**

8. In the past 12 months has your child had a problem with sneezing, or a runny or blocked nose when he / she did not have a cold or the flu?  Yes  No
9. In the past 12 months has this nose problem been accompanied by itchy / watery eyes?  Yes  No
10. Has your child ever had hay fever?  Yes  No
11. Do any close members of the family have any of the following conditions?
- Asthma  Yes  No
- Eczema  Yes  No
- Hay fever  Yes  No

Adapted from The International Study of Asthma and Allergies in Childhood (ISAAC): Core questionnaire

**These questions ask about your child's food intake and physical activity.**

**WEIGHT PERCEPTION**

1. How would you describe your child's weight?

- Underweight
- Healthy weight
- Overweight
- Obese
- Don't know

2. Do you have any concerns about your child's weight?

Yes  No

3. Do you have any concerns about your child's height?

Yes  No

Comments: \_\_\_\_\_

**DIET**

The following questions are about the food your child eats.

4. How many serves of vegetables does your child usually eat each day?

*(1 serve = ½ cup cooked vegetables, or ½ medium potato, or 1 medium tomato, or 1 cup salad vegetables)*

- \_\_\_ serves per day *(write number of serves) OR*
- \_\_\_ serves per week *(write number of serves)*
- my child doesn't eat vegetables
- don't know

5. How many serves of fruit does your child usually eat each day?

*(1 serve = 1 medium piece, or 2 small pieces of fruit, or 1 cup of diced pieces with no added sugar, or 30 grams of dried fruit such as 4 dried apricots or 1½ tablespoons sultanas)*

- \_\_\_ serves per day *(write number of serves) OR*
- \_\_\_ serves per week *(write number of serves)*
- my child doesn't eat fruit
- don't know

6. Do you have any concerns about your child's eating habits?

Yes  No

Comments: \_\_\_\_\_

**PHYSICAL ACTIVITY**

The following questions are about your child's physical activity. Physical activity is any activity that increases your heart rate and makes you get out of breath some of the time.

7. On about how many days during the school week does your child usually do physical activity outside of school hours? This includes before and after school sports, playing with friends, walking/ riding to and from school.

- \_\_\_ number of school days per week
- none
- don't know

8. On these days, about how many hours does your child usually do physical activity? *(in hours and minutes)*

- \_\_\_ hours \_\_\_ minutes *(average time on each school day)*
- don't know

9. On about how many days during the weekend does your child usually do physical activity?

- \_\_\_ number of weekend days
- none
- don't know

10. On a typical weekend day, about how many hours does your child usually do physical activity?

- \_\_\_ hours \_\_\_ minutes *(average time on each weekend day)*
- don't know

# Strengths and Difficulties Questionnaire

**P or T**<sup>4-10</sup>

For each item, please mark the box for Not True, Somewhat True or Certainly True. It would help us if you answered all items as best you can even if you are not absolutely certain. Please give your answers on the basis of the child's behaviour over the last six months or this school year.

Child's name .....

Male/Female

Date of birth.....

|                                                                       | Not<br>True              | Somewhat<br>True         | Certainly<br>True        |
|-----------------------------------------------------------------------|--------------------------|--------------------------|--------------------------|
| Considerate of other people's feelings                                | <input type="checkbox"/> | <input type="checkbox"/> | <input type="checkbox"/> |
| Restless, overactive, cannot stay still for long                      | <input type="checkbox"/> | <input type="checkbox"/> | <input type="checkbox"/> |
| Often complains of headaches, stomach-aches or sickness               | <input type="checkbox"/> | <input type="checkbox"/> | <input type="checkbox"/> |
| Shares readily with other children, for example toys, treats, pencils | <input type="checkbox"/> | <input type="checkbox"/> | <input type="checkbox"/> |
| Often loses temper                                                    | <input type="checkbox"/> | <input type="checkbox"/> | <input type="checkbox"/> |
| Rather solitary, prefers to play alone                                | <input type="checkbox"/> | <input type="checkbox"/> | <input type="checkbox"/> |
| Generally well behaved, usually does what adults request              | <input type="checkbox"/> | <input type="checkbox"/> | <input type="checkbox"/> |
| Many worries or often seems worried                                   | <input type="checkbox"/> | <input type="checkbox"/> | <input type="checkbox"/> |
| Helpful if someone is hurt, upset or feeling ill                      | <input type="checkbox"/> | <input type="checkbox"/> | <input type="checkbox"/> |
| Constantly fidgeting or squirming                                     | <input type="checkbox"/> | <input type="checkbox"/> | <input type="checkbox"/> |
| Has at least one good friend                                          | <input type="checkbox"/> | <input type="checkbox"/> | <input type="checkbox"/> |
| Often fights with other children or bullies them                      | <input type="checkbox"/> | <input type="checkbox"/> | <input type="checkbox"/> |
| Often unhappy, depressed or tearful                                   | <input type="checkbox"/> | <input type="checkbox"/> | <input type="checkbox"/> |
| Generally liked by other children                                     | <input type="checkbox"/> | <input type="checkbox"/> | <input type="checkbox"/> |
| Easily distracted, concentration wanders                              | <input type="checkbox"/> | <input type="checkbox"/> | <input type="checkbox"/> |
| Nervous or clingy in new situations, easily loses confidence          | <input type="checkbox"/> | <input type="checkbox"/> | <input type="checkbox"/> |
| Kind to younger children                                              | <input type="checkbox"/> | <input type="checkbox"/> | <input type="checkbox"/> |
| Often lies or cheats                                                  | <input type="checkbox"/> | <input type="checkbox"/> | <input type="checkbox"/> |
| Picked on or bullied by other children                                | <input type="checkbox"/> | <input type="checkbox"/> | <input type="checkbox"/> |
| Often volunteers to help others (parents, teachers, other children)   | <input type="checkbox"/> | <input type="checkbox"/> | <input type="checkbox"/> |
| Thinks things out before acting                                       | <input type="checkbox"/> | <input type="checkbox"/> | <input type="checkbox"/> |
| Steals from home, school or elsewhere                                 | <input type="checkbox"/> | <input type="checkbox"/> | <input type="checkbox"/> |
| Gets along better with adults than with other children                | <input type="checkbox"/> | <input type="checkbox"/> | <input type="checkbox"/> |
| Many fears, easily scared                                             | <input type="checkbox"/> | <input type="checkbox"/> | <input type="checkbox"/> |
| Good attention span, sees work through to the end                     | <input type="checkbox"/> | <input type="checkbox"/> | <input type="checkbox"/> |

Signature .....

Date .....

Parent / Teacher / Other (Please specify):

**Thank you very much for your help**
